# Supplementary material for: Assessing soil degradation under land-use change: insight from soil erosion and soil aggregate stability in a small karst catchment in southwest China
Source: PeerJ. 2020 Apr 6;8:e8908. doi: 10.7717/peerj.8908 (PMC7144589; doi:10.7717/peerj.8908)
Supplement: File S1 [file peerj-08-8908-s001.xlsx]

## Sheet: Soil profile
Site	Soil layer	Depth (cm)		Visible characteristics
NV1	Topsoil	0~30	3	Black-brown, fine grained, loose, abundant plant roots and debris, accumulated on the unweathered bedrock
NV2	Topsoil	0~50	4	Black-brown, fine grained, loose, abundant plant roots and debris
	Subsoil	50~90	2	Red, clayey, tight, no rootlet
NV3	Topsoil	0~30	3	Black-brown, fine grained, loose, abundant plant roots and debris
	Subsoil	30~50	1	Red, clayey, tight, no rootlet
NV4	Topsoil	0~50	4	Black-brown, fine grained, loose, abundant plant roots and debris, accumulated in crevices between unweathered bedrock
NV5	Topsoil	0~30	3	Black-brown, fine grained, loose, abundant plant roots and debris
	Subsoil	30~90	3	Gray, clayey, tight, no rootlet
AL1	Topsoil	0~10	1	Black-brown, fine grained, loose, abundant plant roots and debris
	Subsoil	10~90	5	Red, block structure, tight, few plant roots
AL2	Topsoil	0~10	1	Brown, fine grained, loose, abundant plant roots and debris
	Subsoil	10~90	5	Yellow, block structure, tight, few plant roots
AL3	Topsoil	0~70	5	Black-brown, fine grained, loose, abundant plant roots and debris, accumulated in crevices between unweathered bedrock
AL4	Topsoil	0~20	2	Black-brown, fine grained, loose, abundant plant roots and debris
	Subsoil	20~70	3	Red, block structure, tight, few plant roots
AL5	Topsoil	0~30	3	Black-brown, fine grained, loose, abundant plant roots and debris
	Subsoil	30~70	2	Red, block structure, tight, few plant roots
CL1	Topsoil	0~10	2	Brown, fine grained, loose, few plant roots
	Subsoil	10~30	1	Yellow, block structure, tight, no rootlet
CL2	Topsoil	0~10	1	Brown, fine grained, loose, few plant roots
	Subsoil	10~70	4	Yellow, block structure, tight, no rootlet
CL3	Topsoil	0~50	4	Brown,fine grained, loose, few plant roots accumulated on the unweathered bedrock
CL4	Topsoil	0~50	4	Brown,fine grained, loose, few plant roots accumulated on the unweathered bedrock
CL5	Topsoil	0~70	5	Brown,fine grained, loose, few plant roots, accumulated on the unweathered bedrock
CL6	Topsoil	0~50	4	Brown,fine grained, loose, few plant roots, accumulated on the unweathered bedrock
CL7	Topsoil	0~10	1	Brown, fine grained, loose, few plant roots
	Subsoil	10~70	4	Red, block structure, tight, no rootlet
CL8	Topsoil	0~10	1	Brown, fine grained, loose, few plant roots
	Subsoil	10~30	2	Yellow, block structure, tight, no rootlet

## Sheet: Aggregate composition
Sampling site	Depth	Stage	DEPTH	DEPTH	Macro-aggregate	Micro-aggregate	Silt and clay size fraction	WSA	MWD (mm)	GMD	AR
		1: NV; 2: AL; 3:CL	1: Topsoil; 2: Subsoil
AL5	0-10	2	1	1	82.9072	8.01998	9.07278	90.9272	0.947261	0.681747	10.3376
AL5	10-20	2	1	1	80.7857	6.7555	12.4588	87.5412	0.922375	0.615902	11.9585
AL5	20-30	2	1	1	80.0851	7.89742	12.0175	87.9825	0.916107	0.612003	10.1407
AL5	30-50	2	2	2	70.3621	10.9355	18.7024	81.2976	0.813098	0.448204	6.4343
AL5	50-70	2	2	2	26.4478	12.6717	60.8806	39.1194	0.332868	0.0890711	2.08716
AL4	0-10	2	1	1	80.809	7.10803	12.0829	87.9171	0.923072	0.620242	11.3687
AL4	10-20	2	1	1	84.5317	5.61492	9.85336	90.1466	0.9621	0.694797	15.0548
AL4	20-30	2	2	2	77.4285	9.87738	12.6941	87.3059	0.889399	0.573453	7.83897
AL4	30-50	2	2	2	75.3719	9.18563	15.4425	84.5575	0.865942	0.524542	8.20541
AL4	50-70	2	2	2	72.3662	14.1465	13.4874	86.5126	0.839125	0.510989	5.1155
NV5	0-10	1	1	1	90.4718	5.58172	3.94646	96.0535	1.02731	0.867572	16.2086
NV5	10-20	1	1	1	83.5573	6.20193	10.2408	89.7592	0.952129	0.676768	13.4728
NV5	20-30	1	1	1	72.9455	6.80069	20.2538	79.7462	0.836307	0.459433	10.7262
NV5	30-50	1	2	2	58.283	8.27279	33.4443	66.5557	0.677079	0.272068	7.04514
NV5	50-70	1	2	2	64.7877	10.2639	24.9484	75.0516	0.751023	0.359455	6.31219
NV5	70-90	1	2	2	68.1866	13.5814	18.232	81.768	0.792507	0.432608	5.02059
CL1	0-10	3	1	1	74.1536	10.5834	15.263	84.737	0.854307	0.51349	7.00661
CL1	10-20	3	1	1	74.0882	11.1282	14.7835	85.2165	0.85427	0.517122	6.65768
CL1	20-30	3	2	2	61.3037	16.9253	21.771	78.229	0.721078	0.354296	3.62202
AL1	0-10	2	1	1	76.8811	9.41188	13.707	86.293	0.882804	0.557266	8.16852
AL1	10-20	2	2	2	76.0405	9.17986	14.7797	85.2203	0.873279	0.537799	8.2834
AL1	20-30	2	2	2	69.5834	10.6083	19.8083	80.1917	0.804134	0.432834	6.55933
AL1	30-50	2	2	2	66.8706	10.9518	22.1776	77.8224	0.774764	0.393333	6.10591
AL1	50-70	2	2	2	67.2486	8.83038	23.921	76.079	0.776264	0.38446	7.6156
AL1	70-90	2	2	2	61.0687	9.72012	29.2111	70.7889	0.70949	0.309732	6.28271
NV2	0-10	1	1	1	80.7038	8.83508	10.4611	89.5389	0.924075	0.636685	9.13448
NV2	10-20	1	1	1	75.1166	9.4888	15.3946	84.6054	0.863517	0.5223	7.91634
NV2	20-30	1	1	1	79.1572	8.41642	12.4264	87.5736	0.906563	0.596455	9.40509
NV2	30-50	1	1	1	84.7238	6.88186	8.3943	91.6057	0.965794	0.715448	12.3112
NV2	50-70	1	2	2	71.7017	12.875	15.4233	84.5767	0.830237	0.487493	5.56906
NV2	70-90	1	2	2	67.8159	15.512	16.6721	83.3279	0.790848	0.441242	4.37184
NV1	0-10	1	1	1	83.3018	7.93658	8.76163	91.2384	0.951491	0.690899	10.4959
NV1	10-20	1	1	1	83.1005	8.107	8.79253	91.2075	0.949492	0.687745	10.2505
NV1	20-30	1	1	1	83.6917	7.52243	8.78586	91.2141	0.955256	0.696027	11.1256
CL2	0-10	3	1	1	66.8238	11.8792	21.297	78.703	0.775409	0.399044	5.62527
CL2	10-20	3	2	2	66.5184	12.261	21.2206	78.7794	0.772531	0.397136	5.42518
CL2	20-30	3	2	2	66.963	13.9411	19.0959	80.9041	0.779515	0.415813	4.80326
CL2	30-50	3	2	2	64.1864	17.7421	18.0716	81.9284	0.753765	0.400384	3.61775
CL2	50-70	3	2	2	52.4709	23.8354	23.6937	76.3063	0.632687	0.28701	2.20138
CL7	0-10	3	1	1	53.3443	16.5225	30.1332	69.8668	0.63314	0.261062	3.22857
CL7	10-20	3	2	2	35.1545	22.7692	42.0763	57.9237	0.441134	0.147207	1.54395
CL7	20-30	3	2	2	23.2355	15.8757	60.8888	39.1112	0.301587	0.0835033	1.46359
CL7	30-50	3	2	2	35.2834	20.2384	44.4782	55.5218	0.439386	0.141535	1.74338
CL7	50-70	3	2	2	64.4015	17.2771	18.3213	81.6787	0.755547	0.400368	3.72756
AL2	0-10	2	1	1	79.7135	8.95572	11.3308	88.6692	0.913347	0.614775	8.90085
AL2	10-20	2	2	2	78.5376	8.91301	12.5494	87.4506	0.900377	0.58783	8.81157
AL2	20-30	2	2	2	74.69	10.8243	14.4857	85.5143	0.8605	0.526123	6.90022
AL2	30-50	2	2	2	77.6249	8.23565	14.1395	85.8605	0.889504	0.561389	9.42547
AL2	50-70	2	2	2	70.2255	15.3952	14.3793	85.6207	0.817171	0.481969	4.56152
AL2	70-90	2	2	2	65.2744	16.9599	17.7657	82.2343	0.764739	0.411402	3.84875
NV4	0-10	1	1	1	72.0682	10.4266	17.5052	82.4948	0.831203	0.473583	6.91197
NV4	10-20	1	1	1	86.2004	6.04309	7.75656	92.2434	0.980965	0.745184	14.2643
NV4	20-30	1	1	1	79.3551	9.72129	10.9236	89.0764	0.910367	0.614722	8.16302
NV4	30-50	1	1	1	83.0473	8.18984	8.76284	91.2372	0.949012	0.687368	10.1403
NV3	0-10	1	1	1	81.5046	7.81293	10.6825	89.3175	0.931594	0.644497	10.432
NV3	10-20	1	1	1	85.0251	8.60845	6.36642	93.6336	0.971262	0.745686	9.87694
NV3	20-30	1	1	1	90.8347	4.65161	4.51368	95.4863	1.03013	0.865308	19.5276
NV3	30-50	1	2	2	81.1537	10.8644	7.98188	92.0181	0.931554	0.670833	7.46971
AL3	0-10	2	1	1	72.2057	12.2965	15.4977	84.5023	0.835051	0.491805	5.87203
AL3	10-20	2	1	1	76.6701	12.182	11.1479	88.8521	0.883949	0.580232	6.2937
AL3	20-30	2	1	1	78.2603	9.55626	12.1835	87.8165	0.898134	0.588311	8.18942
AL3	30-50	2	1	1	83.3693	8.82264	7.80806	92.1919	0.95334	0.703432	9.44947
AL3	50-70	2	1	1	82.9301	8.70181	8.36807	91.6319	0.948365	0.690491	9.53021
CL8	0-10	3	1	1	63.2077	19.2733	17.519	82.481	0.744928	0.396405	3.27954
CL8	10-20	3	1	1	71.4269	15.7624	12.8106	87.1894	0.830828	0.507409	4.53146
CL8	20-30	3	1	1	84.8611	8.10076	7.03818	92.9618	0.968825	0.734583	10.4757
CL8	30-50	3	1	1	85.2446	7.43914	7.31628	92.6837	0.972211	0.736673	11.4589
CL8	50-70	3	1	1	84.8148	8.23636	6.94887	93.0511	0.968486	0.735045	10.2976
CL3	0-10	3	1	1	66.2027	16.5183	17.2789	82.7211	0.774385	0.422703	4.00783
CL3	10-20	3	1	1	68.3276	18.3701	13.3023	86.6977	0.800041	0.472768	3.71949
CL3	20-30	3	1	1	58.2742	20.7765	20.9493	79.0507	0.692613	0.338227	2.80482
CL3	30-50	3	1	1	84.5408	7.92812	7.53109	92.4689	0.965091	0.723636	10.6634
CL4	0-10	3	1	1	69.3216	14.1295	16.5488	83.4512	0.80566	0.455744	4.90615
CL4	10-20	3	1	1	85.9387	6.5186	7.54267	92.4573	0.978685	0.744055	13.1836
CL4	20-30	3	1	1	80.8055	8.56507	10.6294	89.3706	0.924855	0.636117	9.43431
CL4	30-50	3	1	1	77.8235	9.48463	12.6919	87.3081	0.893247	0.578035	8.20522
CL5	0-10	3	1	1	52.9327	14.6591	32.4081	67.5919	0.62629	0.248849	3.61091
CL5	10-20	3	2	2	52.3296	23.8365	23.8338	76.1662	0.631137	0.2855	2.19535
CL5	20-30	3	2	2	51.4246	22.8089	25.7665	74.2335	0.61991	0.271076	2.25459
CL6	0-10	3	1	1	57.2386	16.3645	26.3969	73.6031	0.675721	0.301261	3.49772
CL6	10-20	3	1	1	76.1895	9.21765	14.5928	85.4072	0.874964	0.54117	8.26561
CL6	20-30	3	1	1	72.4138	12.3612	15.225	84.775	0.837417	0.496215	5.85814
CL6	30-50	3	1	1	80.0739	11.0679	8.85829	91.1417	0.919946	0.646511	7.23482

## Sheet: k
Sampling site	Depth	Stage	DEPTH	SOC (%)	Clay(%)	Silt (%)	Sand (%)	A	B	C	E	D	K	K factor
		1: NV; 2: AL; 3:CL	1: Topsoil; 2: Subsoil
AL5	0-10	2	1	3.71188	16.659	81.679	1.662	0.497671	0.945838	0.750049	0.98338	1	0.35306	0.0101537
AL5	10-20	2	1	3.35988	19.435	80.091	0.474	0.499276	0.936902	0.750152	0.99526	1	0.350901	0.010007
AL5	20-30	2	1	2.74112	18.588	81.412	0	0.5	0.94017	0.751153	1	1	0.353106	0.0101568
AL5	30-50	2	2	1.82184	18.284	81.716	0	0.5	0.941222	0.773745	1	1	0.364133	0.0109059
AL5	50-70	2	2	0.326013	18.689	81.311	0	0.5	0.93982	0.994937	1	1	0.467531	0.0179298
AL4	0-10	2	1	3.20116	17.96	82.04	0	0.5	0.94234	0.750255	1	1	0.353498	0.0101834
AL4	10-20	2	1	2.4361	17.592	82.261	0.147	0.4998	0.943517	0.753164	0.99853	1	0.355169	0.010297
AL4	20-30	2	2	1.87673	16.469	83.531	0	0.5	0.947446	0.769935	1	1	0.364736	0.0109468
AL4	30-50	2	2	1.36857	16.221	83.779	0	0.5	0.948289	0.836819	1	1	0.396773	0.0131231
AL4	50-70	2	2	1.01317	16.58	83.42	0	0.5	0.947068	0.918046	1	1	0.434726	0.0157013
NV5	0-10	1	1	5.8	14.461	85.284	0.255	0.499712	0.954098	0.75	0.99745	1	0.357581	0.0104608
NV5	10-20	1	1	5.64935	16.586	83.414	0	0.5	0.947047	0.75	1	1	0.355143	0.0102952
NV5	20-30	1	1	2.16913	18.452	81.548	0	0.5	0.940641	0.757668	1	1	0.356347	0.0103769
NV5	30-50	1	2	0.803196	20.494	79.506	0	0.5	0.933512	0.956936	1	1	0.446656	0.0165117
NV5	50-70	1	2	0.428362	18.143	81.857	0	0.5	0.941709	0.991142	1	1	0.466684	0.0178722
NV5	70-90	1	2	0.462199	13.183	86.817	0	0.5	0.958476	0.989511	1	1	0.474211	0.0183836
CL1	0-10	3	1	2.46878	18.685	81.315	0	0.5	0.939834	0.752839	1	1	0.353772	0.010202
CL1	10-20	3	1	2.28517	21.135	78.865	0	0.5	0.931248	0.755221	1	1	0.351649	0.0100578
CL1	20-30	3	2	1.64154	19.29	80.71	0	0.5	0.937731	0.791364	1	1	0.371043	0.0113753
AL1	0-10	2	1	3.84049	18.015	81.856	0.129	0.49982	0.94207	0.750032	0.99871	1	0.353165	0.0101608
AL1	10-20	2	2	1.47327	19.708	80.292	0	0.5	0.936271	0.816568	1	1	0.382264	0.0121376
AL1	20-30	2	2	1.08851	20.863	79.137	0	0.5	0.93221	0.901114	1	1	0.420014	0.0147019
AL1	30-50	2	2	0.974863	20.252	79.748	0	0.5	0.934364	0.926166	1	1	0.432688	0.0155629
AL1	50-70	2	2	0.680149	23.084	76.916	0	0.5	0.924283	0.972702	1	1	0.449526	0.0167067
AL1	70-90	2	2	0.649326	23.57	76.43	0	0.5	0.922527	0.975866	1	1	0.450131	0.0167478
NV2	0-10	1	1	3.28037	19.839	80.161	0	0.5	0.935813	0.750197	1	1	0.351022	0.0100152
NV2	10-20	1	1	3.39636	19.44	80.56	0	0.5	0.937208	0.750135	1	1	0.351516	0.0100488
NV2	20-30	1	1	3.20266	19.116	80.884	0	0.5	0.938337	0.750254	1	1	0.351995	0.0100813
NV2	30-50	1	1	2.29653	17.671	82.329	0	0.5	0.943335	0.755028	1	1	0.356122	0.0103617
NV2	50-70	1	2	1.56549	20.226	79.774	0	0.5	0.934455	0.801616	1	1	0.374537	0.0116126
NV2	70-90	1	2	1.03817	22.48	77.52	0	0.5	0.926455	0.912551	1	1	0.422719	0.0148856
NV1	0-10	1	1	4.25303	20.349	75.823	3.828	0.492976	0.931163	0.750009	0.96172	1	0.344285	0.00955754
NV1	10-20	1	1	3.2604	18.081	80.986	0.933	0.498641	0.941335	0.75021	0.99067	1	0.35214	0.0100912
NV1	20-30	1	1	3.6886	16.636	83.195	0.169	0.499782	0.946781	0.750053	0.99831	1	0.354913	0.0102795
CL2	0-10	3	1	2.47176	23.029	76.602	0.369	0.499338	0.924174	0.752811	0.99631	1	0.347403	0.00976941
CL2	10-20	3	2	1.94297	24.572	75.096	0.332	0.499366	0.918583	0.766101	0.99668	1	0.351417	0.0100421
CL2	20-30	3	2	1.28197	21.362	78.638	0	0.5	0.930443	0.855767	1	1	0.398121	0.0132147
CL2	30-50	3	2	0.948073	21.092	78.908	0	0.5	0.9314	0.931604	1	1	0.433848	0.0156417
CL2	50-70	3	2	0.985003	23.207	76.793	0	0.5	0.923839	0.924054	1	1	0.426839	0.0151655
CL7	0-10	3	1	2.05762	20.904	79.096	0	0.5	0.932065	0.761074	1	1	0.354685	0.0102641
CL7	10-20	3	2	0.497906	20.644	79.356	0	0.5	0.932983	0.987548	1	1	0.460683	0.0174646
CL7	20-30	3	2	0.460584	20.042	79.911	0.047	0.499927	0.935068	0.989594	0.99953	1	0.462602	0.0175949
CL7	30-50	3	2	0.425837	19.17	80.83	0	0.5	0.938149	0.991256	1	1	0.464973	0.017756
CL7	50-70	3	2	0.549228	18.718	81.282	0	0.5	0.93972	0.984242	1	1	0.462456	0.017585
AL2	0-10	2	1	2.8688	21.891	77.83	0.279	0.499525	0.928342	0.750757	0.99721	1	0.348149	0.00982005
AL2	10-20	2	2	1.63006	21.376	78.624	0	0.5	0.930393	0.792795	1	1	0.368806	0.0112233
AL2	20-30	2	2	1.67413	20.212	79.788	0	0.5	0.934504	0.78752	1	1	0.36797	0.0111665
AL2	30-50	2	2	1.49978	21.903	78.097	0	0.5	0.928518	0.811983	1	1	0.37697	0.0117779
AL2	50-70	2	2	0.9538	19.964	80.035	0	0.5	0.935374	0.930459	1	1	0.435164	0.015731
AL2	70-90	2	2	0.766614	19.267	80.733	0	0.5	0.937811	0.962169	1	1	0.451166	0.0168181
NV4	0-10	1	1	3.42756	18.87	81.01	0.12	0.499825	0.939113	0.750122	0.9988	1	0.352102	0.0100886
NV4	10-20	1	1	3.43588	17.895	82.105	0	0.5	0.942564	0.750119	1	1	0.353518	0.0101848
NV4	20-30	1	1	3.757	19.571	80.315	0.114	0.499828	0.936672	0.750042	0.99886	1	0.351151	0.010024
NV4	30-50	1	1	4.01309	16.485	83.515	0	0.5	0.947391	0.750019	1	1	0.35528	0.0103045
NV3	0-10	1	1	5.51538	15.863	83.649	0.488	0.499388	0.949239	0.75	0.99512	1	0.355529	0.0103214
NV3	10-20	1	1	4.68365	13.376	86.624	0	0.5	0.957837	0.750002	1	1	0.35919	0.0105701
NV3	20-30	1	1	2.47171	16.077	83.923	0	0.5	0.948777	0.752811	1	1	0.357125	0.0104298
NV3	30-50	1	2	1.27211	12.683	87.317	0	0.5	0.960129	0.858017	1	1	0.411904	0.014151
AL3	0-10	2	1	5.13305	17.415	82.549	0.038	0.499949	0.944192	0.750001	0.99962	1	0.354036	0.01022
AL3	10-20	2	1	4.272	18.73	81.271	0	0.5	0.939679	0.750008	1	1	0.352383	0.0101077
AL3	20-30	2	1	4.13425	19.086	80.914	0	0.5	0.938441	0.750013	1	1	0.351921	0.0100763
AL3	30-50	2	1	3.98268	17.97	82.029	0	0.5	0.942305	0.75002	1	1	0.353374	0.010175
AL3	50-70	2	1	2.01778	11.61	88.389	0	0.5	0.963653	0.762619	1	1	0.36745	0.0111312
CL8	0-10	3	1	4.7848	15.848	84.091	0.059	0.499928	0.949521	0.750002	0.99941	1	0.35602	0.0103547
CL8	10-20	3	1	4.57664	16.447	83.552	0	0.5	0.94752	0.750003	1	1	0.355321	0.0103073
CL8	20-30	3	1	5.34109	16.436	83.566	0	0.5	0.947559	0.75	1	1	0.355335	0.0103082
CL8	30-50	3	1	3.65205	14.75	85.248	0	0.5	0.953252	0.750059	1	1	0.357498	0.0104551
CL8	50-70	3	1	2.39522	13.611	86.388	0	0.5	0.957056	0.753624	1	1	0.36063	0.0106679
CL3	0-10	3	1	4.4031	18.071	81.928	0.002	0.499997	0.941957	0.750005	0.99998	1	0.353234	0.0101655
CL3	10-20	3	1	4.55404	16.714	83.252	0.033	0.499958	0.946592	0.750003	0.99967	1	0.354943	0.0102816
CL3	20-30	3	1	4.68787	16.453	83.492	0.056	0.499929	0.947469	0.750002	0.99944	1	0.355252	0.0103025
CL3	30-50	3	1	5.32865	17.928	82.072	0	0.5	0.94245	0.75	1	1	0.353419	0.0101781
CL4	0-10	3	1	4.10001	22.333	77.667	0	0.5	0.926981	0.750014	1	1	0.347624	0.00978443
CL4	10-20	3	1	3.99206	21.318	78.683	0	0.5	0.9306	0.75002	1	1	0.348984	0.00987679
CL4	20-30	3	1	4.24625	19.741	80.259	0	0.5	0.936156	0.750009	1	1	0.351063	0.010018
CL4	30-50	3	1	2.85385	19.649	80.35	0	0.5	0.936477	0.750795	1	1	0.351551	0.0100512
CL5	0-10	3	1	2.53867	22.164	77.835	0	0.5	0.927585	0.752252	1	1	0.348889	0.00987031
CL5	10-20	3	2	1.05795	19.199	80.801	0	0.5	0.938048	0.908111	1	1	0.425926	0.0151035
CL5	20-30	3	2	0.894613	17.854	82.114	0.03	0.499959	0.942686	0.941786	0.9997	1	0.443867	0.0163223
CL6	0-10	3	1	3.35845	17.663	82.336	0	0.5	0.943362	0.750153	1	1	0.353833	0.0102062
CL6	10-20	3	1	2.94988	18.531	81.469	0	0.5	0.940368	0.75058	1	1	0.352911	0.0101435
CL6	20-30	3	1	3.32946	17.19	82.81	0	0.5	0.944985	0.750168	1	1	0.354449	0.010248
CL6	30-50	3	1	2.82381	18.45	81.549	0	0.5	0.940647	0.750878	1	1	0.353156	0.0101602
